# Supplementary material for: Sugarcane Workweek Study: Risk Factors for Daily Changes in Creatinine
Source: PubMed Central journal article supplement — Kidney Int Rep. 2021 Jun 22;6(9):2404–14. doi: 10.1016/j.ekir.2021.06.003 (PMC8418948; doi:10.1016/j.ekir.2021.06.003), 2021-06-22
Supplement: mmc1.pdf [file mmc1.pdf]

Article: Sugarcane Workweek Study: Risk Factors for Daily Changes in Creatinine

Supplementary Material

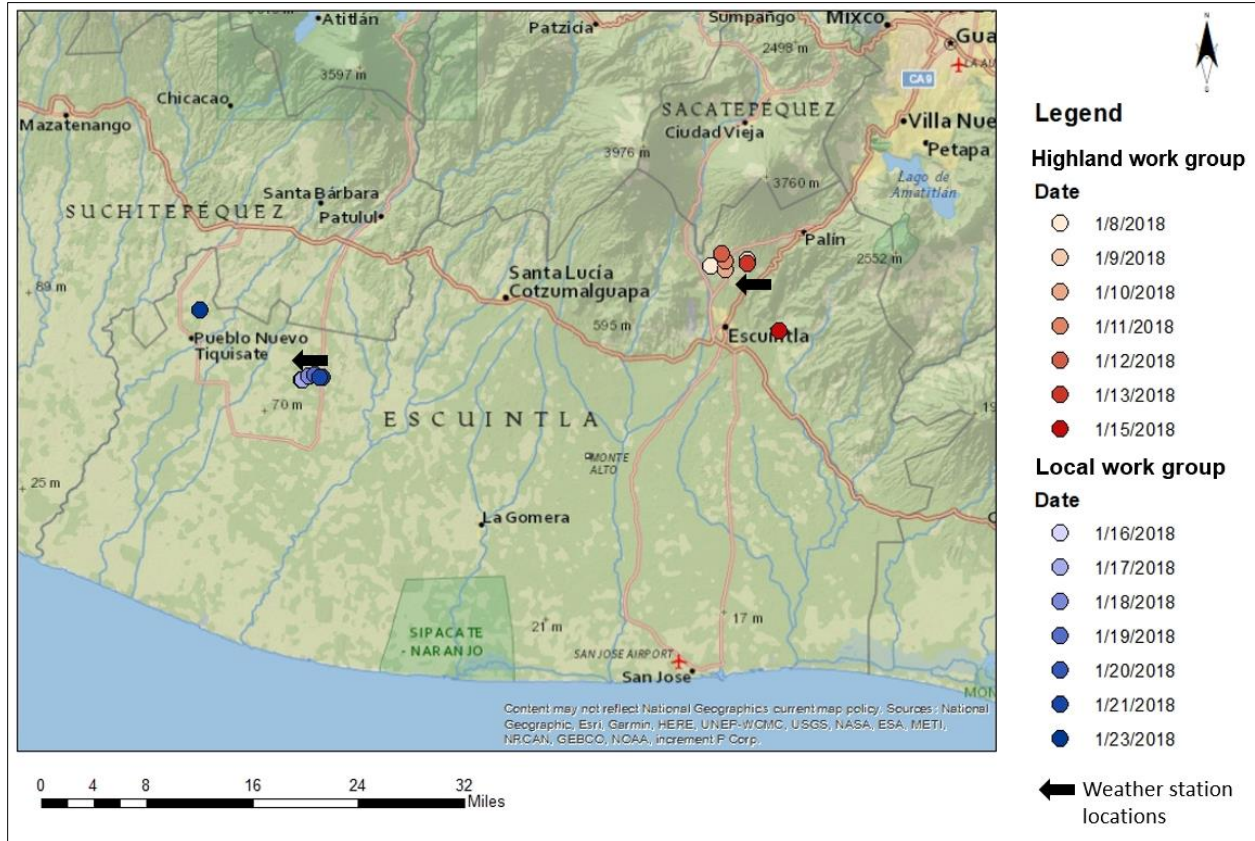

Figure S1: Map of study field locations by work group and date and location of weather stations.

Table S1: Distribution of markers of kidney function and daily risk factors. Mean (SD) or n (%).

| Variables                                         | Day 1 (n=98)  | Day 2 (n=97)  | Day 3 (n=98)  | Day 4 (n=94)  | Day 5 (n=94)  | Day 6 (n=98)  | Day 8 (n=94)   |
|---------------------------------------------------|---------------|---------------|---------------|---------------|---------------|---------------|----------------|
| <b>Kidney function</b>                            |               |               |               |               |               |               |                |
| Pre-shift creatinine (mg/dL)                      | 0.66 (0.15)   | 0.76 (0.15)   | 0.75 (0.19)   | 0.71 (0.20)   | 0.74 (0.21)   | 0.74 (0.22)   | 0.70 (0.19)    |
| Change in creatinine (%)                          | 38% (29%)     | 15% (23%)     | 17% (26%)     | 23% (25%)     | 14% (32%)     | 16% (35%)     | 11% (23%)      |
| Acute Kidney Injury*, n (%)                       | 34 (35%)      | 12 (12%)      | 13 (14%)      | 16 (17%)      | 13 (14%)      | 23 (24%)      | 6 (6%)         |
| <b>Hydration and fluid intake</b>                 |               |               |               |               |               |               |                |
| Weight change across shift (%)                    | 0.05% (2.08%) | 0.92% (2.78%) | 0.61% (1.87%) | 1.26% (2.19%) | 0.64% (2.32%) | 0.53% (1.82%) | -0.68% (2.28%) |
| Pre-shift urine specific gravity                  | 1.012 (0.007) | 1.011 (0.007) | 1.010 (0.006) | 1.009 (0.006) | 1.009 (0.005) | 1.009 (0.005) | 1.010 (0.006)  |
| Post-shift urine specific gravity                 | 1.007 (0.007) | 1.008 (0.007) | 1.006 (0.006) | 1.006 (0.007) | 1.006 (0.006) | 1.005 (0.006) | 1.006 (0.006)  |
| Number of electrolyte packets                     | 1.29 (0.54)   | 1.36 (0.53)   | 1.40 (0.59)   | 1.37 (0.59)   | 1.39 (0.59)   | 1.44 (0.68)   | 1.44 (0.73)    |
| Amount of electrolyte solution (L)                | 5.17 (2.31)   | 5.45 (3.67)   | 5.46 (2.26)   | 5.36 (2.51)   | 5.41 (2.72)   | 5.56 (2.93)   | 5.41 (3.14)    |
| Number of sugar-sweetened beverages               | 1.67 (1.34)   | 2.62 (2.33)   | 2.35 (2.26)   | 2.80 (2.97)   | 1.80 (2.06)   | 2.32 (2.17)   | 2.77 (3.77)    |
| Water intake, number of 5-L containers (L), n (%) |               |               |               |               |               |               |                |
| Less than 2 containers (< 10 L)                   | 1 (1%)        | 3 (3%)        | 2 (2%)        | 1 (1%)        | 4 (4%)        | 2 (2%)        | 2 (2%)         |
| 2-3 containers (10-14 L)                          | 17 (18%)      | 16 (17%)      | 7 (8%)        | 21 (24%)      | 3 (3%)        | 5 (5%)        | 6 (7%)         |
| 3-4 containers (15-19 L)                          | 40 (43%)      | 67 (71%)      | 64 (70%)      | 61 (69%)      | 69 (74%)      | 69 (72%)      | 65 (71%)       |
| 4 containers or greater (≥20 L)                   | 36 (38%)      | 9 (9%)        | 19 (21%)      | 6 (7%)        | 17 (18%)      | 20 (21%)      | 18 (20%)       |
| <b>Work intensity and heat exposure</b>           |               |               |               |               |               |               |                |
| Number of rest breaks                             | 3.48 (0.63)   | 3.70 (0.69)   | 3.80 (0.73)   | 3.44 (0.52)   | 3.84 (0.43)   | 3.84 (0.42)   | 3.86 (0.46)    |
| Work hours                                        | 10.46 (0.85)  | 10.05 (1.02)  | 10.93 (0.51)  | 9.33 (1.10)   | 11.00 (1.10)  | 10.88 (0.82)  | 11.29 (0.69)   |
| Worked the prior day, n (%)                       | 2 (2%)        | 97 (100%)     | 96 (100%)     | 93 (100%)     | 90 (97%)      | 96 (100%)     | 15 (16%)       |
| Amount of sugarcane harvested (tons)              | 7.12 (3.23)   | 6.49 (1.57)   | 7.56 (3.10)   | 3.92 (1.90)   | 6.00 (1.86)   | 6.78 (2.71)   | 5.87 (2.11)    |
| Standardized amount of sugarcane harvested        | 0.28 (0.88)   | 0.23 (0.82)   | 0.45 (0.90)   | -0.63 (0.87)  | 0.05 (0.76)   | 0.21 (0.78)   | -0.05 (0.73)   |
| Average WBGT (C°)                                 | 22.4 (1.4)    | 22.9 (1.8)    | 22.7 (2.0)    | 22.6 (1.9)    | 23.1 (1.3)    | 22.7 (2.4)    | 21.3 (3.0)     |
| Maximum WBGT (C°)                                 | 25.2 (1.9)    | 25.5 (2.4)    | 25.4 (2.3)    | 25.3 (2.5)    | 25.6 (1.7)    | 26.5 (1.8)    | 23.9 (3.7)     |
| <b>Lifestyle factors and water source</b>         |               |               |               |               |               |               |                |
| Number of cigarettes smoked                       | 0.06 (0.53)   | 0.02 (0.21)   | 0.00 (0.00)   | 0.00 (0.00)   | 0.01 (0.10)   | 0.00 (0.00)   | 0.01 (0.10)    |
| NSAID use, n (%)                                  | 2 (2%)        | 3 (3%)        | 6 (7%)        | 5 (6%)        | 12 (13%)      | 3 (3%)        | 7 (8%)         |
| Drinking water source, n (%)                      |               |               |               |               |               |               |                |
| Well                                              | 10 (11%)      | 11 (12%)      | 12 (13%)      | 10 (11%)      | 12 (13%)      | 9 (10%)       | 12 (13%)       |
| Municipal                                         | 31 (35%)      | 35 (37%)      | 32 (35%)      | 31 (35%)      | 28 (30%)      | 33 (35%)      | 31 (34%)       |
| Dormitory tanks                                   | 48 (54%)      | 49 (52%)      | 48 (52%)      | 48 (54%)      | 53 (57%)      | 53 (56%)      | 49 (53%)       |

\* Acute Kidney Injury (AKI) is defined as an increase in post-shift creatinine by ≥ 0.3 mg/dl or to ≥ 1.5 times pre-shift.

Table S2: Spearman correlation coefficients for urinary biomarkers of exposure <sup>A</sup> (Day 2 only).

|                   | Cadmium (µg/g) | Nickel (µg/g) | Lead (µg/g) | Uranium (µg/g) | Glyphosate (ng/g) | Cotinine (ng/mL) |
|-------------------|----------------|---------------|-------------|----------------|-------------------|------------------|
| Arsenic (µg/g)    | 0.12           | -0.11         | 0.36*       | 0.19           | 0.39*             | 0.14             |
| Cadmium (µg/g)    |                | -0.05         | 0.16        | -0.02          | -0.03             | 0.12             |
| Nickel (µg/g)     |                |               | -0.18       | 0.08           | -0.02             | -0.004           |
| Lead (µg/g)       |                |               |             | 0.34*          | 0.52*             | 0.22**           |
| Uranium (µg/g)    |                |               |             |                | 0.73*             | -0.02            |
| Glyphosate (ng/g) |                |               |             |                |                   | 0.09             |

<sup>A</sup> Metals and glyphosate are corrected for urine creatinine.

\* p-value < 0.01, \*\* p-value < 0.05

Table S3: Urinary biomarkers of exposure distributions by reported water source for first 5-L water container fill-up.

| Exposures <sup>A</sup> , mean (SD) | Well (n = 10) | Municipal (n = 32) | Dormitory (n = 39) | p-value* |
|------------------------------------|---------------|--------------------|--------------------|----------|
| Cadmium (ug/g)                     | 1.73 (0.74)   | 1.65 (0.72)        | 1.47 (0.56)        | 0.35     |
| Arsenic (ug/g)                     | 11.91 (4.03)  | 21.04 (18.77)      | 10.44 (5.00)       | < 0.01   |
| Nickel (ug/g)                      | 3.83 (1.79)   | 2.49 (1.09)        | 3.26 (1.14)        | < 0.01   |
| Lead (ug/g)                        | 12.09 (9.67)  | 10.26 (7.05)       | 3.19 (3.26)        | < 0.01   |
| Uranium (ug/g)                     | 0.34 (0.24)   | 0.19 (0.18)        | 0.14 (0.21)        | 0.03     |
| Glyphosate (ng/g)                  | 3.49 (1.95)   | 3.56 (4.59)        | 0.81 (0.80)        | < 0.01   |

<sup>A</sup> Exposures are corrected for urine creatinine.

\*based on ANOVA.

Table S4: Baseline kidney function by reported drinking water source for first 5-L water container fill-up.

| Water Source    | Baseline eGFR, mean (SD) | p-value* |
|-----------------|--------------------------|----------|
| Well            | 106.89 (26.01)           | 0.03     |
| Municipal       | 112.47 (13.76)           |          |
| Dormitory tanks | 119.81 (13.31)           |          |

eGFR: estimated glomerular filtration rate, ml/min/1.73m<sup>2</sup>.

\*based on ANOVA.

STROBE Statement—Checklist of items that should be included in reports of *cohort studies*

|                              | <b>Item No</b> | <b>Recommendation</b>                                                                                                                                                                                                                                                                                                                  | <b>Page No</b> |
|------------------------------|----------------|----------------------------------------------------------------------------------------------------------------------------------------------------------------------------------------------------------------------------------------------------------------------------------------------------------------------------------------|----------------|
| <b>Title and abstract</b>    | 1              | (a) Indicate the study's design with a commonly used term in the title or the abstract                                                                                                                                                                                                                                                 | 1              |
|                              |                | (b) Provide in the abstract an informative and balanced summary of what was done and what was found                                                                                                                                                                                                                                    | 2              |
| <b>Introduction</b>          |                |                                                                                                                                                                                                                                                                                                                                        |                |
| Background/rationale         | 2              | Explain the scientific background and rationale for the investigation being reported                                                                                                                                                                                                                                                   | 4-5            |
| Objectives                   | 3              | State specific objectives, including any prespecified hypotheses                                                                                                                                                                                                                                                                       | 5              |
| <b>Methods</b>               |                |                                                                                                                                                                                                                                                                                                                                        |                |
| Study design                 | 4              | Present key elements of study design early in the paper                                                                                                                                                                                                                                                                                | 6              |
| Setting                      | 5              | Describe the setting, locations, and relevant dates, including periods of recruitment, exposure, follow-up, and data collection                                                                                                                                                                                                        | 6              |
| Participants                 | 6              | (a) Give the eligibility criteria, and the sources and methods of selection of participants. Describe methods of follow-up<br><br>(b) For matched studies, give matching criteria and number of exposed and unexposed                                                                                                                  | 6              |
| Variables                    | 7              | Clearly define all outcomes, exposures, predictors, potential confounders, and effect modifiers. Give diagnostic criteria, if applicable                                                                                                                                                                                               | 7-9            |
| Data sources/<br>measurement | 8*             | For each variable of interest, give sources of data and details of methods of assessment (measurement). Describe comparability of assessment methods if there is more than one group                                                                                                                                                   | 7-9            |
| Bias                         | 9              | Describe any efforts to address potential sources of bias                                                                                                                                                                                                                                                                              | 6              |
| Study size                   | 10             | Explain how the study size was arrived at                                                                                                                                                                                                                                                                                              | 6              |
| Quantitative variables       | 11             | Explain how quantitative variables were handled in the analyses. If applicable, describe which groupings were chosen and why                                                                                                                                                                                                           | 7-9            |
| Statistical methods          | 12             | (a) Describe all statistical methods, including those used to control for confounding<br><br>(b) Describe any methods used to examine subgroups and interactions<br><br>(c) Explain how missing data were addressed<br><br>(d) If applicable, explain how loss to follow-up was addressed<br><br>(e) Describe any sensitivity analyses | 11-12          |

| <b>Results</b>   |     |                                                                                                                                                                                                                                                                                                                |       |
|------------------|-----|----------------------------------------------------------------------------------------------------------------------------------------------------------------------------------------------------------------------------------------------------------------------------------------------------------------|-------|
| Participants     | 13* | <p>(a) Report numbers of individuals at each stage of study—eg numbers potentially eligible, examined for eligibility, confirmed eligible, included in the study, completing follow-up, and analysed</p> <p>(b) Give reasons for non-participation at each stage</p> <p>(c) Consider use of a flow diagram</p> | 12    |
| Descriptive data | 14* | <p>(a) Give characteristics of study participants (eg demographic, clinical, social) and information on exposures and potential confounders</p> <p>(b) Indicate number of participants with missing data for each variable of interest</p> <p>(c) Summarise follow-up time (eg, average and total amount)</p>  | 12-13 |
| Outcome data     | 15* | Report numbers of outcome events or summary measures over time                                                                                                                                                                                                                                                 | 13    |

|                          |    |                                                                                                                                                                                                                                                                                                                                                                                                                       |       |
|--------------------------|----|-----------------------------------------------------------------------------------------------------------------------------------------------------------------------------------------------------------------------------------------------------------------------------------------------------------------------------------------------------------------------------------------------------------------------|-------|
| Main results             | 16 | (a) Give unadjusted estimates and, if applicable, confounder-adjusted estimates and their precision (eg, 95% confidence interval). Make clear which confounders were adjusted for and why they were included<br><br>(b) Report category boundaries when continuous variables were categorized<br><br>(c) If relevant, consider translating estimates of relative risk into absolute risk for a meaningful time period | 13-14 |
| Other analyses           | 17 | Report other analyses done—eg analyses of subgroups and interactions, and sensitivity analyses                                                                                                                                                                                                                                                                                                                        | 14    |
| <b>Discussion</b>        |    |                                                                                                                                                                                                                                                                                                                                                                                                                       |       |
| Key results              | 18 | Summarise key results with reference to study objectives                                                                                                                                                                                                                                                                                                                                                              | 14-15 |
| Limitations              | 19 | Discuss limitations of the study, taking into account sources of potential bias or imprecision. Discuss both direction and magnitude of any potential bias                                                                                                                                                                                                                                                            | 18    |
| Interpretation           | 20 | Give a cautious overall interpretation of results considering objectives, limitations, multiplicity of analyses, results from similar studies, and other relevant evidence                                                                                                                                                                                                                                            | 18    |
| Generalisability         | 21 | Discuss the generalisability (external validity) of the study results                                                                                                                                                                                                                                                                                                                                                 | 18    |
| <b>Other information</b> |    |                                                                                                                                                                                                                                                                                                                                                                                                                       |       |
| Funding                  | 22 | Give the source of funding and the role of the funders for the present study and, if applicable, for the original study on which the present article is based                                                                                                                                                                                                                                                         | 19    |
